# Supplementary material
Source: Springer Nature journal article supplement (https://www.springermedizin.de/resource/supplementary/12889_2007_829_MOESM2_ESM.pdf/9501862)
Supplement: MOESM2 [file 9501862]

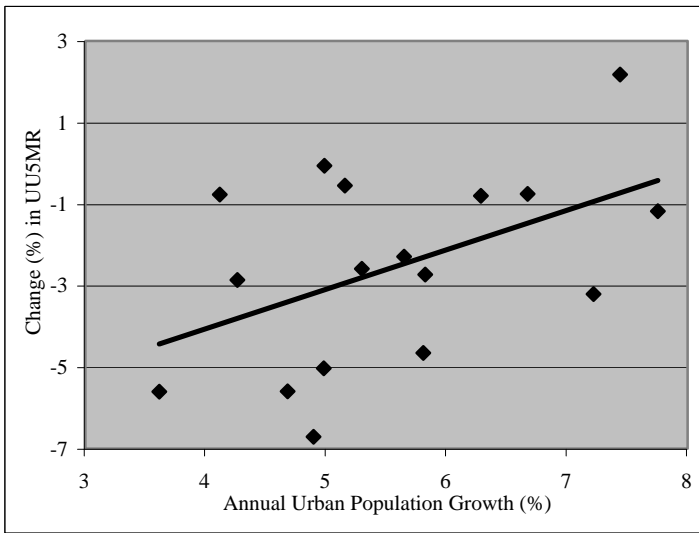

Population growth and under-five mortality in urban areas of SSA (4 outliers excluded).  $r = +0.41(0.09)$

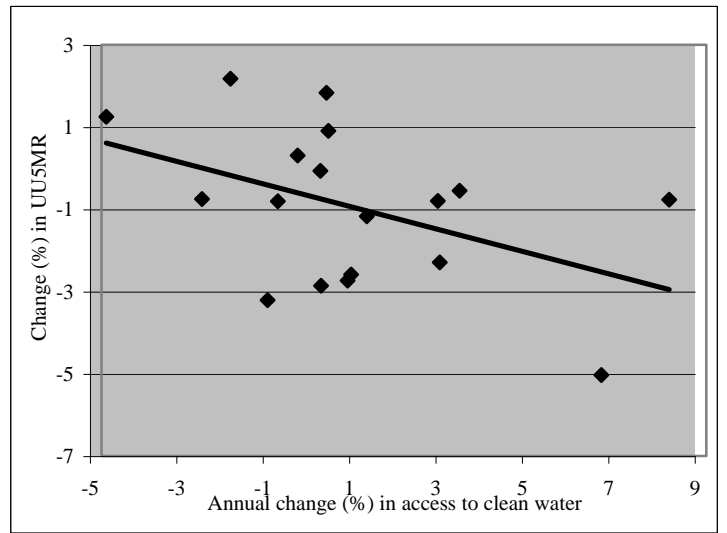

Access to safe water and under-five mortality in urban areas of SSA (4 outliers excluded).  $r = -0.45(0.06)$

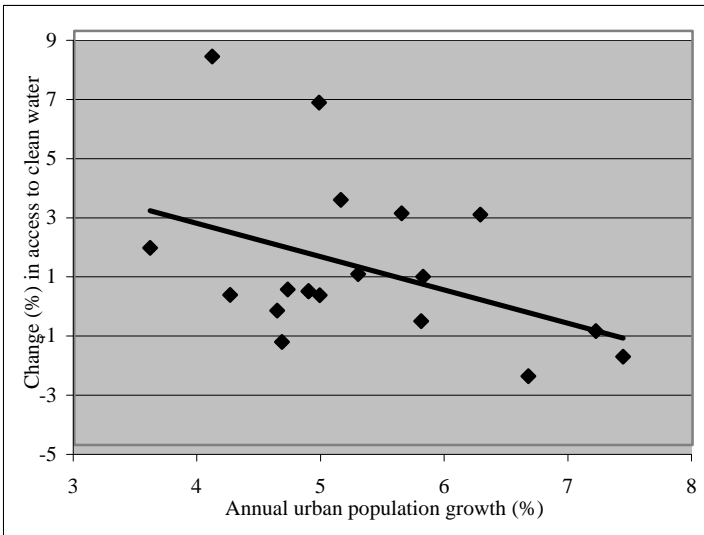

Population growth and access to safe water in urban areas of SSA (3 outliers excluded).  $r = -0.42(0.07)$

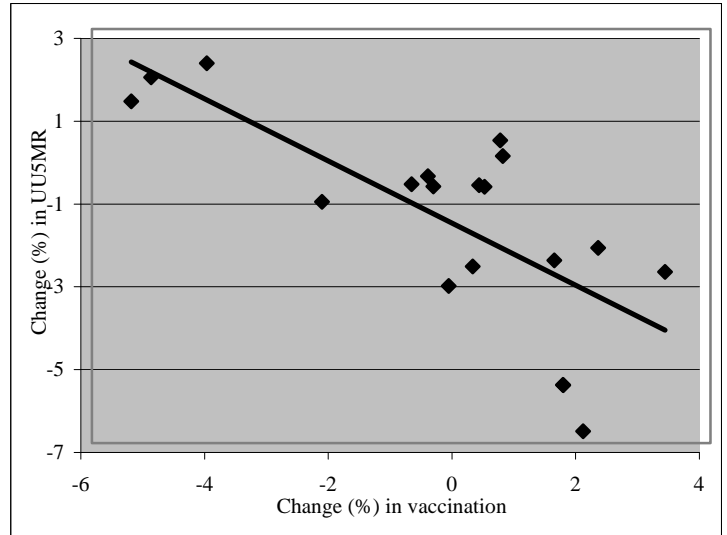

Child vaccination and under-five mortality in urban areas of SSA (3 outliers excluded).  $r = -0.73(0.00)$

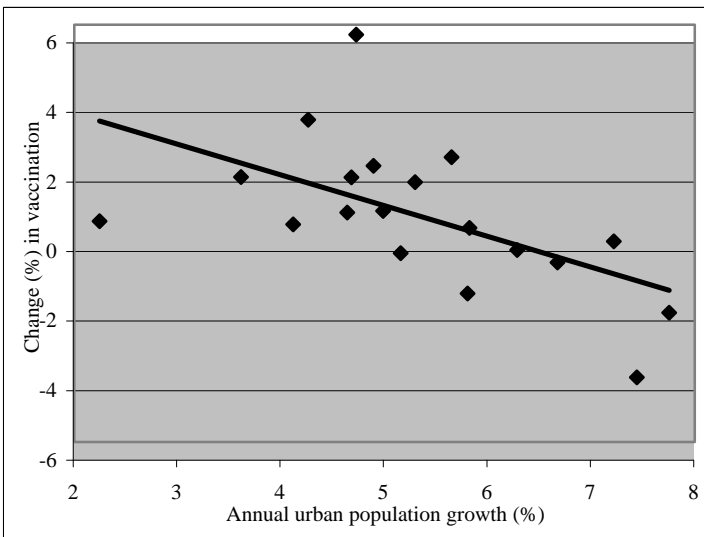

Population growth and child vaccination in urban areas of SSA (3 outliers excluded).  $r = -0.57(0.01)$
